# Supplementary material for: Phage vs. Phage: Direct Selections of Sandwich Binding Pairs
Source: MDPI journal article supplement (doi:10.3390/v15030807), 2023-03-22
Supplement: s1 [file s1]

## SI Appendix:

# Phage vs Phage: Direct Selections of Sandwich Binding Pairs for Improved Biomarker Detection

Emily C. Sanders,<sup>[a]</sup> Alicia M. Santos,<sup>[a]</sup> Eugene K. Nguyen,<sup>[a]</sup> Aidan A. Gelston,<sup>[a]</sup> Sudipta Majumdar,<sup>[a]</sup> and Gregory A. Weiss<sup>\*[a,b,c]</sup>

---

Departments of <sup>[a]</sup>Chemistry, <sup>[b]</sup>Molecular Biology and Biochemistry, and <sup>[c]</sup>Pharmaceutical Sciences  
University of California, Irvine  
Irvine, CA 92697 (USA)  
E-mail: gweiss@uci.edu

\*To whom correspondence should be addressed.

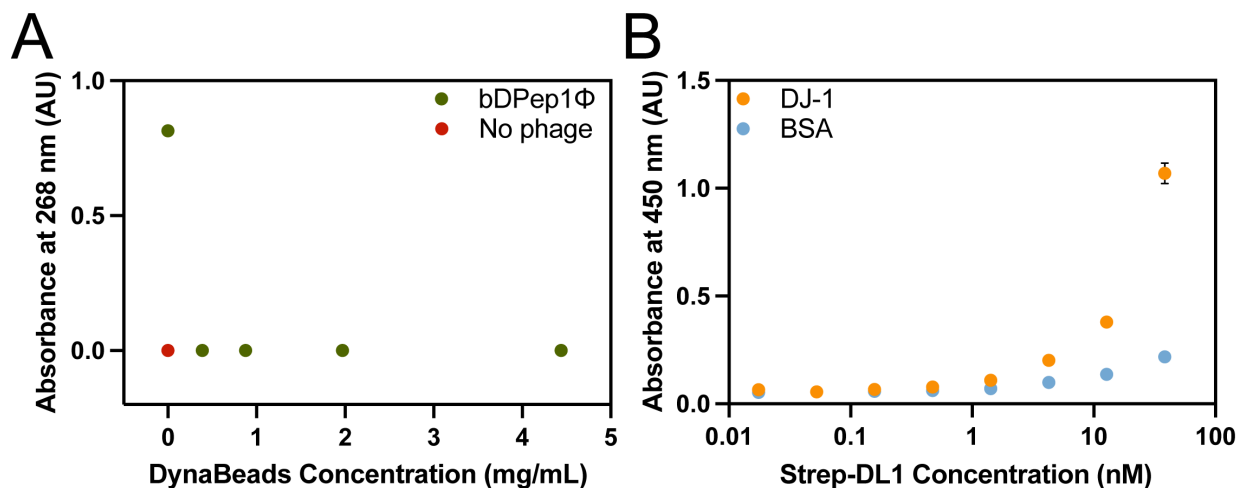

**Figure S1. Additional Assays for PVP Selections and Strep-DL1 Binding.** A) DynaBeads titration ELISA determined concentration of DynaBeads required for complete pulldown of bDL1Φ. B) The strep-DPep1 complex can bind DJ-1 in a dose-dependent manner.

**Table S1.** Conditions for PVP peptide selections.

|                | <b>Titers</b>          | <b>Blocking</b>      | <b>Washes</b> |
|----------------|------------------------|----------------------|---------------|
| <b>Round 1</b> | $7.9 \times 10^8$      | Nonfat Milk          | 3             |
| <b>Round 2</b> | $3.4 \times 10^5$      | Bovine serum albumin | 6             |
| <b>Round 3</b> | $2.4 \times 10^5$      | Human serum albumin  | 6             |
| <b>Round 4</b> | $\sim 1.0 \times 10^6$ | Pierce blocking      | 6             |

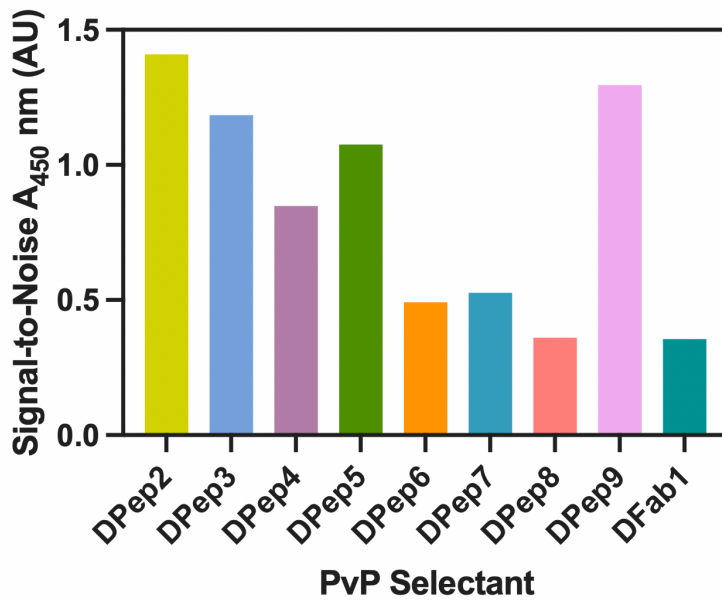

**Figure S2. PvP selectant spot assay results.** Data are normalized to the signal observed for binding to BSA.

**Table S2.** Proteins used for binding specificity assays.

| Protein        | Native Species           | Molecular Weight (kDa) | pI     |
|----------------|--------------------------|------------------------|--------|
| DJ-1           | <i>Homo sapiens</i>      | 20.7                   | 6.7    |
| HSA            | <i>Homo sapiens</i>      | 66.5                   | 4.7    |
| Hb             | <i>Homo sapiens</i>      | 64                     | 6.8    |
| HEWL           | <i>Gallus domesticus</i> | 14.4                   | 11.3   |
| <i>E. coli</i> | <i>Escherichia coli</i>  | Varies                 | Varies |

**Table S3.** Titers, blocking agents, and stringency for PvP Fab selections.

|         | Titers            | Blocking             | Washes |
|---------|-------------------|----------------------|--------|
| Round 1 | $6.7 \times 10^8$ | Nonfat Milk          | 3      |
| Round 2 | $3.3 \times 10^5$ | Bovine serum albumin | 3      |
| Round 3 | $6.7 \times 10^5$ | Pierce blocking      | 6      |
